# Supplementary material for: An Integrated Peptidomics and In Silico Approach to Identify Novel Anti-Diabetic Peptides in Parmigiano-Reggiano Cheese
Source: MDPI journal article supplement (doi:10.3390/biology10060563), 2021-06-21
Supplement: s1 [file s1]

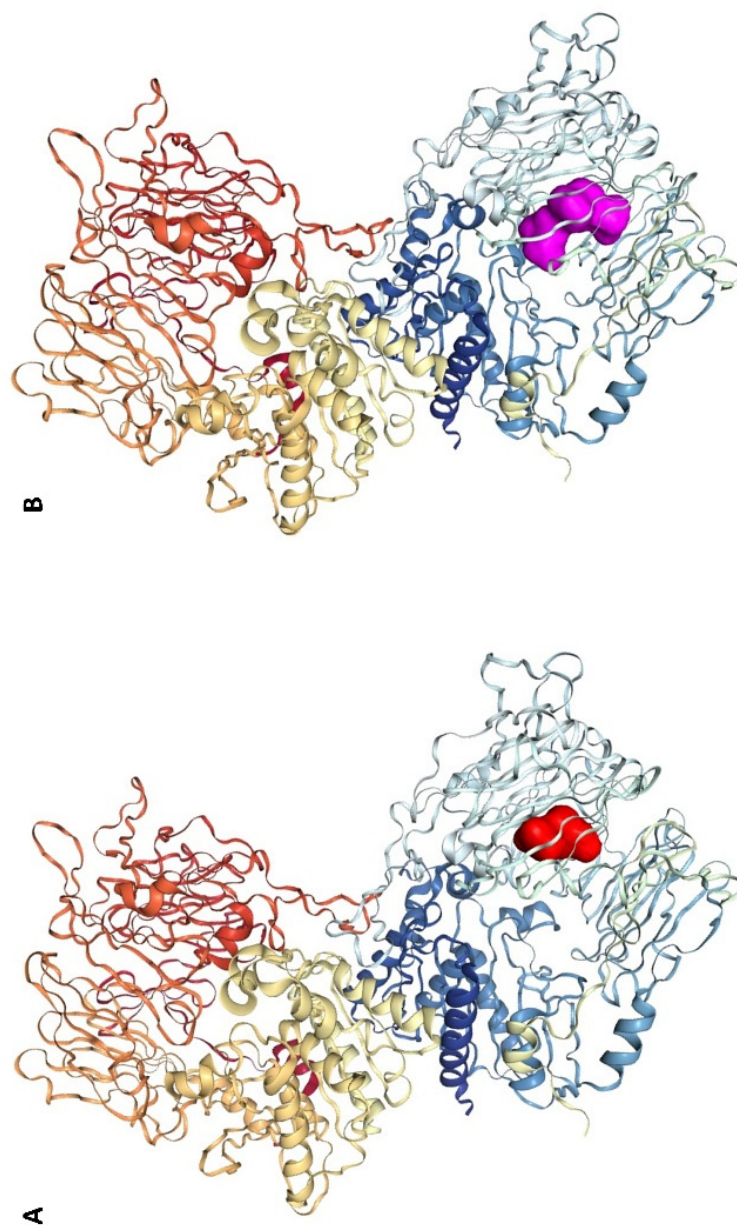

**Figure S1.** Peptides binding site prediction of DPP-IV enzyme (PDB ID entry code: 1NU6) with IPP (A) and APFPE (B).
