# Supplementary material for: An Integrated Peptidomics and In Silico Approach to Identify Novel Anti-Diabetic Peptides in Parmigiano-Reggiano Cheese
Source: MDPI journal article supplement (doi:10.3390/biology10060563), 2021-06-21
Supplement: s1 [file s1]

**Table S5.** PepSite *P* value for  $\alpha$ -amylase. Peptides were ranked on the basis of the PepSite *P* value.

| Sequence  | PepSite <i>P</i> value for $\alpha$ -amylase (pdb: 1PIG) | SAR | GID |
|-----------|----------------------------------------------------------|-----|-----|
| PNP       | 1.37E-04                                                 | /   | /   |
| PPF       | 1.79E-04                                                 | /   | /   |
| IPP       | 2.37E-04                                                 | /   | /   |
| NIPPL     | 3.36E-04                                                 | /   | /   |
| QGP       | 3.54E-04                                                 | /   | /   |
| FALPQ     | 4.05E-04                                                 | /   | /   |
| VPP       | 4.14E-04                                                 | /   | /   |
| PNPIG     | 5.92E-04                                                 | /   | /   |
| IPPL      | 6.74E-04                                                 | /   | /   |
| LPPT      | 7.94E-04                                                 | /   | /   |
| PFL       | 9.59E-04                                                 | /   | /   |
| VPPFL     | 1.01E-03                                                 | /   | /   |
| LHLPLP    | 1.02E-03                                                 | /   | /   |
| WIQP      | 1.03E-03                                                 | /   | /   |
| LPLP      | 1.04E-03                                                 | /   | /   |
| VVVPPF    | 1.07E-03                                                 | /   | /   |
| VVPPF     | 1.08E-03                                                 | /   | /   |
| GLPQ      | 1.19E-03                                                 | /   | /   |
| FVAP      | 1.46E-03                                                 | /   | /   |
| IPPLT     | 1.52E-03                                                 | /   | /   |
| VAPFP     | 1.57E-03                                                 | /   | /   |
| LVYFPF    | 1.77E-03                                                 | /   | /   |
| EMPFPK    | 2.03E-03                                                 | /   | /   |
| FFVAP     | 2.07E-03                                                 | /   | /   |
| WIQPK     | 2.34E-03                                                 | /   | /   |
| RFFVAPFPE | 2.34E-03                                                 | /   | /   |
| PLW       | 2.52E-03                                                 | /   | /   |
| PGIPN     | 2.53E-03                                                 | /   | /   |
| APFPE     | 2.70E-03                                                 | /   | /   |
| VVPPFL    | 3.04E-03                                                 | /   | /   |
| WDQ       | 3.05E-03                                                 | /   | /   |
| DKIHPF    | 3.24E-03                                                 | /   | /   |
| GIPN      | 3.55E-03                                                 | /   | /   |
| KFQ       | 3.75E-03                                                 | /   | /   |
| VVVPPFL   | 4.11E-03                                                 | /   | /   |
| PGPI      | 4.31E-03                                                 | /   | /   |

|          |          |   |   |
|----------|----------|---|---|
| KIHPF    | 4.31E-03 | / | / |
| PIPN     | 4.66E-03 | / | / |
| IVLNPW   | 5.34E-03 | / | / |
| EPF      | 5.51E-03 | / | / |
| PFPI     | 5.62E-03 | / | / |
| VIPYVRYL | 6.20E-03 | / | / |
| NRLNF    | 6.63E-03 | / | / |
| GPIVL    | 7.49E-03 | / | / |
| PFP      | 7.81E-03 | / | / |
| PIP      | 7.81E-03 | / | / |
| NENLLRF  | 8.48E-03 | / | / |
| FRQFYQL  | 8.52E-03 | / | / |
| FVAPFPE  | 9.19E-03 | / | / |
| FGK      | 9.66E-03 | / | / |
| PGPIP    | 9.92E-03 | / | / |

---

Threshold was set at 0.01. Peptides with *P*-value below the threshold are not shown
