# Supplementary material for: An Integrated Peptidomics and In Silico Approach to Identify Novel Anti-Diabetic Peptides in Parmigiano-Reggiano Cheese
Source: MDPI journal article supplement (doi:10.3390/biology10060563), 2021-06-21
Supplement: s1 [file s1]

**Table S4.** Selection of potential  $\alpha$ -glucosidase-inhibitory peptides on the basis on the PepSite *P* value, structure-activity relationship (SAR) modelling and *in silico* gastro-intestinal digestion (GID) stability. Peptides were ranked on the basis of the PepSite *P* value. Selected peptides were reported in bold red.

| <i>Sequence</i> | <i>PepSite P value for <math>\alpha</math>-glucosidase (pdb: 5NN3)</i> | <i>SAR</i>                                                                          | <i>GID</i>                                                        |
|-----------------|------------------------------------------------------------------------|-------------------------------------------------------------------------------------|-------------------------------------------------------------------|
| PNP             | 1.33E-04                                                               | /                                                                                   | /                                                                 |
| IPP             | 1.55E-04                                                               | /                                                                                   | /                                                                 |
| PFP*            | 1.75E-04                                                               | /                                                                                   | /                                                                 |
| <b>PPF</b>      | 1.93E-04                                                               | F at the C-terminus<br>and P at the<br>penultimate position                         | Stable                                                            |
| QGP             | 2.47E-04                                                               | /                                                                                   | /                                                                 |
| PFPI            | 2.58E-04                                                               | /                                                                                   | /                                                                 |
| VPP             | 3.48E-04                                                               | /                                                                                   | /                                                                 |
| PGPIP           | 3.65E-04                                                               | /                                                                                   | /                                                                 |
| IPPL            | 4.15E-04                                                               | /                                                                                   | /                                                                 |
| LPPT            | 4.23E-04                                                               | /                                                                                   | /                                                                 |
| VAPFP           | 4.48E-04                                                               | /                                                                                   | /                                                                 |
| APFPE           | 4.48E-04                                                               | /                                                                                   | /                                                                 |
| PGPI            | 4.56E-04                                                               | /                                                                                   | /                                                                 |
| PNPIG           | 4.65E-04                                                               | /                                                                                   | /                                                                 |
| PIPN            | 4.71E-04                                                               | /                                                                                   | /                                                                 |
| EMPFPK          | 5.06E-04                                                               | /                                                                                   | /                                                                 |
| PFPE            | 5.80E-04                                                               | /                                                                                   | /                                                                 |
| FVAPFPE         | 6.39E-04                                                               | /                                                                                   | /                                                                 |
| FVAPFP          | 7.41E-04                                                               | /                                                                                   | /                                                                 |
| LPLP            | 7.56E-04                                                               | /                                                                                   | /                                                                 |
| WIQP            | 8.20E-04                                                               | /                                                                                   | /                                                                 |
| KIHPF           | 8.26E-04                                                               | K at the N-terminus, F<br>at the C-terminus and<br>P at the penultimate<br>position | Unstable. Potential<br>cleavage sites: K-I<br>trypsin; P-F pepsin |
| IHPF            | 8.50E-04                                                               | F at the C-terminus<br>and P at the<br>penultimate position                         | Unstable. Potential<br>cleavage sites: P-F<br>pepsin              |
| WIQPK           | 8.51E-04                                                               | /                                                                                   | /                                                                 |
| NIPPL           | 9.27E-04                                                               | /                                                                                   | /                                                                 |

|              |          |                                                             |                                                                   |
|--------------|----------|-------------------------------------------------------------|-------------------------------------------------------------------|
| IPPLT        | 9.27E-04 | /                                                           | /                                                                 |
| GLPQ         | 1.00E-03 | /                                                           | /                                                                 |
| GPIP         | 1.05E-03 | /                                                           | /                                                                 |
| VPPFL        | 1.07E-03 | /                                                           | /                                                                 |
| <b>VVPPF</b> | 1.07E-03 | F at the C-terminus<br>and P at the<br>penultimate position | Stable                                                            |
| DKIHPP       | 1.19E-03 | F at the C-terminus<br>and P at the<br>penultimate position | Unstable. Potential<br>cleavage sites: K-I<br>trypsin; P-F pepsin |
| VAPFPFVF     | 1.32E-03 | /                                                           | /                                                                 |
| PGPIP        | 1.39E-03 | /                                                           | /                                                                 |
| FRQFYQL      | 1.40E-03 | /                                                           | /                                                                 |
| <b>VVVPF</b> | 1.50E-03 | F at the C-terminus<br>and P at the<br>penultimate position | Stable                                                            |
| LVYFPF       | 1.50E-03 | /                                                           | /                                                                 |
| VVPPFL       | 1.50E-03 | /                                                           | /                                                                 |
| FALPQ        | 1.51E-03 | /                                                           | /                                                                 |
| RFFVAPFP     | 1.92E-03 | /                                                           | /                                                                 |
| FVAPFPFVF    | 1.92E-03 | /                                                           | /                                                                 |
| KFQ          | 2.48E-03 | /                                                           | /                                                                 |
| VAPFPFVFGK   | 2.62E-03 | /                                                           | /                                                                 |
| PFL          | 2.82E-03 | /                                                           | /                                                                 |
| LVYFPFGP     | 3.53E-03 | /                                                           | /                                                                 |
| FVAP         | 3.56E-03 | /                                                           | /                                                                 |
| PIP          | 3.60E-03 | /                                                           | /                                                                 |
| VIPYVRYL     | 4.29E-03 | /                                                           | /                                                                 |
| LHLPLP       | 4.34E-03 | /                                                           | /                                                                 |
| VVPPFL       | 5.51E-03 | /                                                           | /                                                                 |
| PLW          | 5.69E-03 | /                                                           | /                                                                 |
| EPF          | 5.94E-03 | F at the C-terminus<br>and P at the<br>penultimate position | Unstable. Potential<br>cleavage sites: E-P<br>pepsin              |
| FGK          | 6.65E-03 | /                                                           | /                                                                 |
| NRLNF        | 6.90E-03 | /                                                           | /                                                                 |
| FFVAP        | 8.18E-03 | /                                                           | /                                                                 |

|            |          |   |   |
|------------|----------|---|---|
| IVLNPW     | 8.39E-03 | / | / |
| QTPVVVPPFL | 9.33E-03 | / | / |

---

\* Previously identified as  $\alpha$ -glucosidase-inhibitor

Threshold was set at 0.01. Peptides with *P*-value below the threshold are not shown
