# Supplementary material for: An Integrated Peptidomics and In Silico Approach to Identify Novel Anti-Diabetic Peptides in Parmigiano-Reggiano Cheese
Source: MDPI journal article supplement (doi:10.3390/biology10060563), 2021-06-21
Supplement: s1 [file s1]

**Table S1.** List of peptides identified in the Parmigiano Reggiano samples after 12 (PR12), 18 (PR18), 24 (PR24) and 30 (PR30) months of ripening.

| Start                            | End | Observed<br>( <i>m/z</i> ) | Calculated<br>( <i>MH</i> <sup>+n</sup> ) | Error<br>(ppm) | Sequence          | <i>z</i> | PR<br>12 | PR<br>18 | PR<br>24 | PR<br>30 |
|----------------------------------|-----|----------------------------|-------------------------------------------|----------------|-------------------|----------|----------|----------|----------|----------|
| <i>β-casein-derived peptides</i> |     |                            |                                           |                |                   |          |          |          |          |          |
| 1                                | 5   | 338.1688                   | 338.1690                                  | -0.59          | REELE             | 2        | X        | X        | X        | X        |
| 1                                | 3   | 417.2445                   | 417.2456                                  | -2.64          | REL               | 1        |          |          | X        |          |
| 1                                | 4   | 546.2870                   | 546.2882                                  | -2.20          | RELE              | 1        | X        | X        | X        | X        |
| 1                                | 6   | 788.4135                   | 788.4149                                  | -1.78          | RELEEL            | 1        | X        | X        | X        | X        |
| 1                                | 11  | 642.8250                   | 642.8251                                  | -0.16          | RELEELNVPGE       | 2        | X        |          |          |          |
| 2                                | 6   | 632.3135                   | 632.3137                                  | -0.32          | ELEEL             | 1        | X        | X        | X        | X        |
| 3                                | 5   | 390.1869                   | 390.1871                                  | -0.51          | LEE               | 1        | X        | X        | X        | X        |
| 3                                | 6   | 503.2717                   | 503.2712                                  | 0.99           | LEEL              | 1        | X        | X        | X        |          |
| 4                                | 6   | 390.1869                   | 390.1871                                  | -0.51          | EEL               | 1        | X        | X        | X        | X        |
| 5                                | 7   | 375.1870                   | 375.1874                                  | -1.07          | ELN               | 1        | X        | X        | X        | X        |
| 6                                | 10  | 499.2874                   | 499.2875                                  | -0.20          | LNVPG             | 1        |          |          |          | X        |
| 7                                | 11  | 515.2452                   | 515.2460                                  | -1.55          | NVPGE             | 1        | X        | X        |          |          |
| 11                               | 13  | 360.2128                   | 360.2129                                  | -0.28          | EIV               | 1        | X        | X        | X        | X        |
| 11                               | 14  | 489.2549                   | 489.2555                                  | -1.23          | EIVE              | 1        | X        | X        | X        | X        |
| 12                               | 14  | 360.2125                   | 360.2129                                  | -1.11          | IVE               | 1        | X        | X        | X        | X        |
| 12                               | 16  | 640.2959                   | 640.2953                                  | 0.94           | IVESL             | 1        | X        | X        | X        | X        |
| 12                               | 28  | 737.9606                   | 737.9590                                  | 2.17           | IVESLSSSEESITRINK | 3        | X        | X        | X        | X        |
| 12                               | 25  | 928.8220                   | 928.8239                                  | -2.05          | IVESLSSSEESITR    | 2        | X        |          |          |          |
| 12                               | 27  | 1042.3902                  | 1042.3874                                 | 2.69           | IVESLSSSEESITRIN  | 2        | X        | X        | X        | X        |
| 13                               | 15  | 334.1605                   | 334.1609                                  | -1.20          | VES               | 1        | X        | X        | X        | X        |
| 13                               | 16  | 527.2111                   | 527.2113                                  | -0.38          | VESL              | 1        | X        |          |          |          |
| 13                               | 25  | 872.2811                   | 872.2818                                  | -0.80          | VESLSSSEESITR     | 2        | X        | X        | X        | X        |
| 13                               | 27  | 657.5674                   | 657.5660                                  | 2.13           | VESLSSSEESITRIN   | 3        | X        | X        | X        | X        |
| 13                               | 28  | 700.2649                   | 700.2643                                  | 0.86           | VESLSSSEESITRINK  | 3        | X        | X        | X        | X        |
| 14                               | 28  | 667.2420                   | 667.2415                                  | 0.75           | ESLSSSEESITRINK   | 3        | X        | X        | X        | X        |
| 14                               | 25  | 822.7476                   | 822.7476                                  | 0.00           | ESLSSSEESITR      | 2        | X        | X        | X        | X        |
| 14                               | 27  | 936.3120                   | 936.3111                                  | 0.96           | ESLSSSEESITRIN    | 2        | X        | X        | X        | X        |
| 15                               | 22  | 573.1081                   | 573.1099                                  | -3.14          | SLSSSEES          | 2        | X        | X        | X        | X        |
| 15                               | 22  | 1065.2432                  | 1065.2462                                 | -2.82          | SLSSSEES          | 1        | X        | X        | X        | X        |
| 15                               | 24  | 640.1928                   | 640.1926                                  | 0.31           | SLSSSEESIT        | 2        | X        | X        | X        | X        |
| 15                               | 24  | 680.1741                   | 680.1758                                  | -2.50          | SLSSSEESIT        | 2        |          | X        |          |          |
| 15                               | 25  | 678.2600                   | 678.2600                                  | 0.00           | SLSSSEESITR       | 2        |          | X        |          |          |
| 15                               | 25  | 718.2423                   | 718.2432                                  | -1.25          | SLSSSEESITR       | 2        | X        | X        | X        | X        |
| 15                               | 25  | 758.2261                   | 758.2263                                  | -0.26          | SLSSSEESITR       | 2        | X        | X        | X        | X        |

|    |    |           |           |       |                         |   |   |   |   |   |
|----|----|-----------|-----------|-------|-------------------------|---|---|---|---|---|
| 15 | 26 | 774.7873  | 774.7852  | 2.71  | SL <u>SSSEES</u> ITRI   | 2 | X | X | X | X |
| 15 | 26 | 814.7691  | 814.7684  | 0.86  | <u>SLSSSEES</u> ITRI    | 2 |   | X |   |   |
| 15 | 27 | 831.8084  | 831.8067  | 2.04  | SL <u>SSSEES</u> ITRIN  | 2 | X | X | X | X |
| 15 | 27 | 871.7898  | 871.7898  | 0.00  | <u>SLSSSEES</u> ITRIN   | 2 | X | X | X | X |
| 15 | 28 | 597.5728  | 597.5719  | 1.51  | SL <u>SSSEES</u> ITRINK | 3 | X | X | X | X |
| 16 | 18 | 386.1306  | 386.1323  | -4.40 | L <u>SS</u>             | 1 | X | X | X | X |
| 16 | 18 | 466.0979  | 466.0986  | -1.50 | L <u>SS</u>             | 1 | X | X | X | X |
| 16 | 21 | 891.1786  | 891.1822  | -4.04 | L <u>SSSEE</u>          | 1 | X | X | X | X |
| 16 | 22 | 978.2115  | 978.2142  | -2.76 | L <u>SSSEES</u>         | 1 | X | X | X | X |
| 16 | 23 | 546.1528  | 546.1528  | 0.00  | L <u>SSSEESI</u>        | 2 | X | X | X | X |
| 16 | 24 | 556.6930  | 556.6934  | -0.72 | L <u>SSSEESIT</u>       | 2 | X |   |   |   |
| 16 | 24 | 596.6767  | 596.6766  | 0.17  | L <u>SSSEESIT</u>       | 2 | X | X | X | X |
| 16 | 25 | 634.7437  | 634.7440  | -0.47 | L <u>SSSEESITR</u>      | 2 | X | X | X | X |
| 16 | 25 | 634.7438  | 634.7440  | -0.32 | L <u>SSSEESITR</u>      | 2 | X | X | X | X |
| 16 | 25 | 674.7270  | 674.7272  | -0.30 | L <u>SSSEESITR</u>      | 2 | X | X | X | X |
| 16 | 26 | 731.2708  | 731.2692  | 2.19  | L <u>SSSEESITRI</u>     | 2 | X | X | X | X |
| 16 | 27 | 788.2888  | 788.2907  | -2.41 | L <u>SSSEESITRIN</u>    | 2 | X | X | X | X |
| 16 | 28 | 568.5627  | 568.5612  | 2.64  | L <u>SSSEESITRINK</u>   | 3 | X | X | X | X |
| 16 | 28 | 595.2157  | 595.2166  | -1.51 | L <u>SSSEESITRINK</u>   | 3 | X | X | X | X |
| 16 | 28 | 541.9043  | 541.9057  | -2.58 | L <u>SSSEESITRINK</u>   | 3 | X | X | X | X |
| 17 | 22 | 778.0945  | 778.0981  | -4.63 | <u>SSSEE</u>            | 1 |   | X |   |   |
| 17 | 22 | 865.1258  | 865.1301  | -4.97 | <u>SSSEES</u>           | 1 | X | X | X | X |
| 17 | 24 | 1079.2592 | 1079.2619 | -2.50 | <u>SSSEESIT</u>         | 1 | X | X | X | X |
| 17 | 25 | 578.2012  | 578.2020  | -1.38 | <u>SSSEESITR</u>        | 2 | X | X | X | X |
| 17 | 25 | 618.1833  | 618.1851  | -2.91 | <u>SSSEESITR</u>        | 2 | X | X | X | X |
| 17 | 26 | 674.7286  | 674.7272  | 2.07  | <u>SSSEESITRI</u>       | 2 | X | X | X | X |
| 17 | 27 | 691.7600  | 691.7655  | -7.95 | <u>SSSEESITRIN</u>      | 2 | X | X | X | X |
| 17 | 27 | 731.7470  | 731.7486  | -2.19 | <u>SSSEESITRIN</u>      | 2 | X | X | X | X |
| 17 | 28 | 755.8103  | 755.8129  | -3.44 | <u>SSSEESITRINK</u>     | 2 | X | X | X | X |
| 17 | 28 | 795.7949  | 795.7961  | -1.51 | <u>SSSEESITRINK</u>     | 2 | X | X | X | X |
| 17 | 31 | 654.2753  | 654.2737  | 2.45  | <u>SSSEESITRINKKIE</u>  | 3 | X |   |   |   |
| 18 | 21 | 611.0975  | 611.0997  | -3.60 | <u>SSEE</u>             | 1 | X | X | X | X |
| 18 | 22 | 618.1625  | 618.1654  | -4.69 | <u>SSEES</u>            | 1 |   | X | X |   |
| 18 | 27 | 648.2490  | 648.2494  | -0.62 | <u>SSEESITRIN</u>       | 2 | X | X | X | X |
| 18 | 22 | 698.1291  | 698.1318  | -3.87 | <u>SSEES</u>            | 1 | X | X | X | X |
| 18 | 24 | 912.2607  | 912.2635  | -3.07 | <u>SSEESIT</u>          | 1 | X | X | X | X |
| 18 | 25 | 988.3946  | 988.3983  | -3.74 | <u>SSEESITR</u>         | 1 | X | X | X | X |
| 18 | 25 | 1068.3604 | 1068.3646 | -3.93 | <u>SSEESITR</u>         | 1 | X | X | X | X |
| 18 | 25 | 574.6683  | 574.6691  | -1.39 | <u>SSEESITR</u>         | 2 | X |   |   |   |
| 18 | 28 | 448.5444  | 448.5449  | -1.11 | <u>SSEESITRINK</u>      | 3 | X |   |   |   |

|    |    |          |          |       |                          |   |   |   |   |   |
|----|----|----------|----------|-------|--------------------------|---|---|---|---|---|
| 18 | 28 | 475.2006 | 475.2004 | 0.42  | <u>SS</u> EE SITRINK     | 3 | X | X | X | X |
| 19 | 25 | 451.1866 | 451.1868 | -0.44 | <u>S</u> EE SITR         | 2 | X | X | X | X |
| 20 | 23 | 557.1842 | 557.1855 | -2.33 | EE <u>S</u> I            | 1 | X | X | X |   |
| 20 | 25 | 367.6874 | 367.6876 | -0.54 | EESITR                   | 2 | X | X | X | X |
| 21 | 23 | 348.1762 | 348.1765 | -0.86 | ESI                      | 1 | X | X | X | X |
| 23 | 25 | 389.2491 | 389.2507 | -4.11 | ITR                      | 1 | X |   |   |   |
| 29 | 31 | 389.2377 | 389.2395 | -4.62 | KIE                      | 1 | X | X | X | X |
| 31 | 33 | 423.2231 | 423.2238 | -1.65 | EKF                      | 1 |   | X | X | X |
| 32 | 34 | 422.2380 | 422.2398 | -4.26 | KFQ                      | 1 |   | X |   |   |
| 32 | 37 | 424.1645 | 424.1653 | -1.89 | KFQ <u>S</u> EE          | 2 | X | X | X | X |
| 32 | 39 | 552.2231 | 552.2239 | -1.45 | KFQ <u>S</u> EEQQ        | 2 | X | X | X | X |
| 32 | 40 | 616.2525 | 616.2532 | -1.14 | KFQ <u>S</u> EEQQQ       | 2 | X | X | X | X |
| 32 | 42 | 731.2982 | 731.2983 | -0.14 | KFQ <u>S</u> EEQQQTE     | 2 | X | X | X | X |
| 32 | 43 | 788.8101 | 788.8118 | -2.16 | KFQ <u>S</u> EEQQQTED    | 2 | X | X | X | X |
| 32 | 44 | 649.6053 | 649.6054 | -0.15 | KFQ <u>S</u> EEQQQTEDELQ | 3 | X | X | X | X |
| 33 | 36 | 590.1851 | 590.1858 | -1.19 | FQ <u>S</u> E            | 1 | X | X | X | X |
| 33 | 37 | 719.2257 | 719.2284 | -3.75 | FQ <u>S</u> EE           | 1 | X | X | X | X |
| 33 | 39 | 488.1752 | 488.1764 | -2.46 | FQ <u>S</u> EEQQ         | 2 | X | X | X | X |
| 33 | 43 | 667.2497 | 667.2508 | -1.65 | FQ <u>S</u> EEQQQTE      | 2 | X | X | X | X |
| 34 | 39 | 828.2733 | 828.2771 | -4.59 | Q <u>S</u> EEQQ          | 1 |   | X |   |   |
| 38 | 46 | 559.7505 | 559.7516 | -1.97 | QQQTEDELQ                | 2 |   |   |   | X |
| 40 | 48 | 553.2529 | 553.2540 | -1.99 | QTEDELQDK                | 2 | X | X | X | X |
| 41 | 46 | 734.3191 | 734.3203 | -1.63 | TEDELQ                   | 1 | X | X | X | X |
| 41 | 48 | 489.2243 | 489.2247 | -0.82 | TEDELQDK                 | 2 |   |   |   | X |
| 41 | 52 | 491.2415 | 491.2403 | 2.44  | TEDELQDKIHPPF            | 3 |   |   | X | X |
| 42 | 46 | 633.2711 | 633.2726 | -2.37 | EDELQ                    | 1 | X | X | X | X |
| 43 | 46 | 504.2291 | 504.2300 | -1.78 | DELQ                     | 1 | X | X | X | X |
| 43 | 47 | 619.2554 | 619.2570 | -2.58 | DELQD                    | 1 | X | X | X |   |
| 43 | 52 | 621.3129 | 621.3117 | 1.93  | DELQDKIHPPF              | 2 |   |   |   | X |
| 44 | 46 | 389.2027 | 389.2031 | -1.03 | ELQ                      | 1 | X | X | X | X |
| 45 | 52 | 499.2775 | 499.2769 | 1.20  | LQDKIHPPF                | 2 |   |   |   | X |
| 46 | 48 | 390.1968 | 390.1983 | -3.84 | QDK                      | 1 |   | X |   |   |
| 47 | 51 | 305.1706 | 305.1714 | -2.62 | DKIHP                    | 2 |   |   | X |   |
| 47 | 52 | 378.7052 | 378.7056 | -1.06 | DKIHPPF                  | 2 | X | X | X | X |
| 48 | 52 | 321.1921 | 321.1921 | 0.00  | KIHPPF                   | 2 | X | X | X | X |
| 49 | 52 | 513.2818 | 513.2820 | -0.39 | IHPF                     | 1 | X | X | X | X |
| 57 | 68 | 650.8517 | 650.8504 | 2.00  | SLVYFPFGPIPN             | 2 | X | X | X | X |
| 58 | 63 | 735.4090 | 735.4076 | 1.90  | LVYFPF                   | 1 | X | X | X | X |
| 58 | 65 | 445.2455 | 445.2445 | 2.25  | LVYFPFGP                 | 2 | X | X | X | X |
| 58 | 68 | 607.3345 | 607.3344 | 0.16  | LVYFPFGPIPN              | 2 | X | X | X | X |

|    |    |          |          |       |                    |   |   |   |   |   |
|----|----|----------|----------|-------|--------------------|---|---|---|---|---|
| 61 | 63 | 360.1918 | 360.1918 | 0.00  | PFP                | 1 | X | X | X | X |
| 63 | 65 | 383.2287 | 383.2289 | -0.52 | PGPI               | 1 | X | X | X | X |
| 63 | 67 | 480.2821 | 480.2817 | 0.83  | PGPIP              | 1 | X | X | X | X |
| 63 | 68 | 594.3245 | 594.3246 | -0.17 | PGPIP_N            | 1 | X | X | X | X |
| 64 | 68 | 497.2709 | 497.2718 | -1.81 | GPIP_N             | 1 |   |   | X | X |
| 65 | 67 | 326.2074 | 326.2074 | 0.00  | PIP                | 1 | X | X | X | X |
| 65 | 68 | 440.2502 | 440.2504 | -0.45 | PIP_N              | 1 | X | X | X | X |
| 66 | 69 | 430.2297 | 430.2296 | 0.23  | IPNS               | 1 |   |   |   | X |
| 68 | 72 | 558.2874 | 558.2882 | -1.43 | NSLPQ              | 1 |   |   | X |   |
| 69 | 72 | 444.2450 | 444.2453 | -0.68 | SLPQ               | 1 | X | X | X | X |
| 70 | 72 | 357.2118 | 357.2132 | -3.92 | LPQ                | 1 |   | X | X | X |
| 73 | 77 | 553.3356 | 553.3344 | 2.17  | NIPPL              | 1 |   |   | X |   |
| 73 | 91 | 696.0588 | 696.0576 | 1.72  | NIPPLTQTPVVPPFLQPE | 3 |   |   |   | X |
| 74 | 76 | 326.2074 | 326.2074 | 0.00  | IPP                | 1 | X | X | X | X |
| 74 | 77 | 439.2922 | 439.2915 | 1.59  | IPPL               | 1 | X | X | X | X |
| 74 | 78 | 540.3405 | 540.3392 | 2.41  | IPPLT              | 1 | X | X | X | X |
| 74 | 82 | 483.2849 | 483.2869 | -4.14 | IPPLTQTPV          | 2 |   | X | X |   |
| 74 | 91 | 658.0452 | 658.0433 | 2.89  | IPPLTQTPVVPPFLQPE  | 3 | X |   |   |   |
| 77 | 79 | 361.2067 | 361.2082 | -4.15 | LTQ                | 1 | X | X | X | X |
| 79 | 81 | 444.2444 | 444.2453 | -2.03 | QTPV               | 1 |   |   | X | X |
| 79 | 88 | 548.8253 | 548.8237 | 2.92  | QTPVVPPFL          | 2 | X | X | X | X |
| 80 | 88 | 968.5525 | 968.5515 | 1.03  | TPVVPPFL           | 1 | X | X | X | X |
| 80 | 92 | 661.8729 | 661.8714 | 2.27  | TPVVPPFLQPE        | 2 | X |   |   |   |
| 80 | 93 | 776.9323 | 776.9258 | 8.37  | TPVVPPFLQPEVM      | 2 |   |   | X |   |
| 81 | 83 | 314.2076 | 314.2074 | 0.64  | PVV                | 1 |   |   |   | X |
| 82 | 84 | 316.2229 | 316.2231 | -0.63 | VVV                | 1 |   |   | X |   |
| 82 | 86 | 510.3285 | 510.3286 | -0.20 | VVVP               | 1 | X | X | X | X |
| 82 | 87 | 329.2020 | 329.2022 | -0.61 | VVVPF              | 2 | X | X | X | X |
| 82 | 90 | 498.2310 | 498.2299 | 2.21  | VVVPFLPQ           | 2 | X |   |   |   |
| 82 | 91 | 562.8219 | 562.8211 | 1.42  | VVVPFLQPE          | 2 |   |   | X |   |
| 82 | 93 | 677.8759 | 677.8756 | 0.44  | VVVPFLQPEVM        | 2 |   |   |   | X |
| 82 | 88 | 770.4805 | 770.4811 | -0.78 | VVVPFL             | 1 | X | X | X | X |
| 83 | 86 | 411.2604 | 411.2602 | 0.49  | VVPP               | 1 | X | X | X | X |
| 83 | 87 | 558.3289 | 558.3286 | 0.54  | VVPPF              | 1 | X | X | X | X |
| 83 | 88 | 671.4140 | 671.4127 | 1.94  | VVPPFL             | 1 | X | X | X | X |
| 84 | 86 | 312.1915 | 312.1918 | -0.96 | VPP                | 1 | X | X | X | X |
| 84 | 88 | 572.3448 | 572.3443 | 0.87  | VPPFL              | 1 |   |   | X | X |
| 85 | 87 | 360.1917 | 360.1918 | -0.28 | PPF                | 1 | X |   |   |   |
| 86 | 88 | 376.2241 | 376.2231 | 2.66  | PFL                | 1 | X | X | X | X |
| 87 | 93 | 863.4355 | 863.4332 | 2.66  | FLQPEVM            | 1 |   |   |   | X |

|     |     |          |          |       |                   |   |   |   |   |   |
|-----|-----|----------|----------|-------|-------------------|---|---|---|---|---|
| 88  | 91  | 486.2555 | 486.2558 | -0.62 | LQPE              | 1 | X | X | X | X |
| 90  | 92  | 344.1816 | 344.1816 | 0.00  | PEV               | 1 |   | X | X | X |
| 90  | 93  | 475.2236 | 475.2221 | 3.16  | PEVM              | 1 | X |   |   |   |
| 91  | 93  | 378.1688 | 378.1693 | -1.32 | EVM               | 1 |   | X |   |   |
| 92  | 97  | 310.6745 | 310.6754 | -2.90 | VMGVSK            | 2 |   | X |   |   |
| 92  | 98  | 368.207  | 368.2061 | 2.44  | VMGVSKV           | 2 | X |   |   |   |
| 100 | 102 | 350.1375 | 350.1380 | -1.43 | EAM               | 1 | X | X | X | X |
| 101 | 105 | 517.2797 | 517.2803 | -1.16 | AMAPK             | 1 | X |   |   |   |
| 108 | 113 | 374.6879 | 374.6885 | -1.60 | EMPFPK            | 2 |   |   | X | X |
| 116 | 118 | 344.1814 | 344.1816 | -0.58 | VEP               | 1 |   |   | X | X |
| 116 | 119 | 491.2494 | 491.2500 | -1.22 | VEPF              | 1 | X | X | X | X |
| 117 | 119 | 392.1804 | 392.1816 | -3.06 | EPF               | 1 |   |   |   | X |
| 122 | 131 | 546.7746 | 546.7752 | -1.10 | SQSLTLTDVE        | 2 | X |   |   |   |
| 129 | 131 | 362.1542 | 362.1558 | -4.42 | DVE               | 1 | X | X | X | X |
| 130 | 132 | 361.1705 | 361.1718 | -3.60 | VEN               | 1 |   |   | X |   |
| 133 | 138 | 345.2218 | 345.2209 | 2.61  | LHLPLP            | 2 | X | X |   |   |
| 135 | 138 | 439.2923 | 439.2915 | 1.82  | LPLP              | 1 | X | X | X |   |
| 151 | 154 | 427.2554 | 427.2551 | 0.70  | LPPT              | 1 | X |   |   |   |
| 155 | 157 | 396.1957 | 396.1952 | 1.26  | VMF               | 1 |   |   | X |   |
| 163 | 166 | 499.2173 | 499.2164 | 1.80  | LSLS              | 1 |   |   |   | X |
| 169 | 172 | 456.3174 | 456.3180 | -1.31 | KVLP              | 1 | X | X | X | X |
| 170 | 172 | 328.2232 | 328.2231 | 0.30  | VLP               | 1 | X | X | X | X |
| 170 | 176 | 652.4015 | 652.4028 | -1.99 | VLPVPQ            | 1 |   | X |   |   |
| 172 | 175 | 440.2503 | 440.2504 | -0.23 | PVPQ              | 1 | X | X | X | X |
| 191 | 193 | 408.2488 | 408.2493 | -1.22 | LLY               | 1 |   | X |   |   |
| 193 | 196 | 536.2351 | 536.2351 | 0.00  | YQEP              | 1 | X |   |   |   |
| 193 | 209 | 941.0402 | 941.0353 | 5.21  | YQEPVLGPVRGPFPIIV | 2 |   |   | X | X |
| 194 | 196 | 373.1713 | 373.1718 | -1.34 | QEP               | 1 |   | X | X | X |
| 194 | 197 | 472.2400 | 472.2402 | -0.42 | QEPV              | 1 | X | X | X | X |
| 196 | 198 | 328.2229 | 328.2231 | -0.61 | PVL               | 1 |   |   | X | X |
| 199 | 209 | 576.3504 | 576.3504 | 0.00  | GPVRGPFPIIV       | 2 |   | X |   |   |
| 204 | 207 | 473.2761 | 473.2758 | 0.63  | PFPI              | 1 | X | X | X | X |
| 206 | 208 | 342.2392 | 342.2387 | 1.46  | PII               | 1 | X | X | X | X |
| 206 | 209 | 441.3069 | 441.3070 | -0.23 | PIIV              | 1 |   |   |   | X |
| 207 | 209 | 344.2544 | 344.2544 | 0.00  | IIV               | 1 | X | X | X | X |

---

*$\alpha$ S1-casein-derived peptides*

---

|    |    |          |          |       |                         |   |  |   |  |   |
|----|----|----------|----------|-------|-------------------------|---|--|---|--|---|
| 1  | 23 | 553.5170 | 553.5164 | 1.08  | RPKHPIKHQGLPQEVLNENLLRF | 5 |  |   |  | X |
| 10 | 12 | 414.2340 | 414.2347 | -1.69 | GLPQ                    | 1 |  | X |  |   |

|    |    |          |          |       |                     |   |   |   |   |   |
|----|----|----------|----------|-------|---------------------|---|---|---|---|---|
| 14 | 18 | 603.2976 | 603.2984 | -1.33 | EVLNE               | 1 |   | X |   |   |
| 17 | 19 | 379.7114 | 379.7111 | 0.79  | NENLLR              | 2 |   | X |   |   |
| 17 | 21 | 602.3144 | 602.3144 | 0.00  | NENLL               | 1 | X |   |   |   |
| 17 | 23 | 453.2471 | 453.2456 | 3.31  | NENLLRF             | 2 | X | X | X | X |
| 18 | 23 | 396.2254 | 396.2241 | 3.28  | ENLLRF              | 2 | X | X | X | X |
| 22 | 30 | 555.2926 | 555.2926 | 0.00  | RFFVAPFPE           | 2 |   | X |   |   |
| 23 | 25 | 412.2237 | 412.2231 | 1.46  | FFV                 | 1 |   | X | X | X |
| 23 | 27 | 580.3128 | 580.3130 | -0.34 | FFVAP               | 1 |   |   | X |   |
| 24 | 27 | 433.2441 | 433.2445 | -0.92 | FVAP                | 1 | X | X | X | X |
| 24 | 29 | 677.3670 | 677.3657 | 1.92  | FVAPFP              | 1 | X | X | X | X |
| 24 | 30 | 806.4076 | 806.4083 | -0.87 | FVAPFPE             | 1 | X | X | X | X |
| 24 | 32 | 526.7760 | 526.7762 | -0.38 | FVAPFPEVF           | 2 |   |   |   | X |
| 24 | 34 | 619.3358 | 619.3344 | 2.26  | FVAPFPEVFGK         | 2 | X | X | X | X |
| 24 | 35 | 683.8562 | 683.8557 | 0.73  | FVAPFPEVFGKE        | 2 |   | X |   |   |
| 24 | 36 | 498.9391 | 498.9397 | -1.20 | FVAPFPEVFGKEK       | 3 | X | X | X | X |
| 24 | 37 | 569.9761 | 569.9750 | 1.93  | FVAPFPEVFGKEKVN     | 3 |   | X | X | X |
| 24 | 41 | 542.0465 | 542.0465 | 0.00  | FVAPFPEVFGKEKVNELSK | 4 |   |   |   | X |
| 25 | 29 | 530.2986 | 530.2973 | 2.45  | VAPFP               | 1 | X | X | X |   |
| 25 | 30 | 659.3402 | 659.3399 | 0.46  | VAPFPE              | 1 | X | X | X | X |
| 25 | 32 | 453.2429 | 453.2420 | 1.99  | VAPFPEVF            | 2 | X |   |   |   |
| 25 | 34 | 545.8019 | 545.8002 | 3.11  | VAPFPEVFGK          | 2 | X | X | X | X |
| 26 | 30 | 560.2724 | 560.2715 | 1.61  | APFPE               | 1 | X |   |   |   |
| 27 | 30 | 489.2350 | 489.2344 | 1.23  | PFPE                | 1 | X | X | X |   |
| 30 | 32 | 394.1970 | 394.1973 | -0.76 | EVF                 | 1 | X | X | X | X |
| 31 | 33 | 322.1757 | 322.1761 | -1.24 | VFG                 | 1 | X | X | X | X |
| 31 | 34 | 450.2697 | 450.2711 | -3.11 | VFGK                | 1 | X | X | X | X |
| 32 | 34 | 351.2020 | 351.2027 | -1.99 | FGK                 | 1 | X | X | X | X |
| 38 | 45 | 478.2097 | 478.2102 | -1.05 | NELSKDIG            | 2 | X |   |   |   |
| 41 | 47 | 408.1622 | 408.1628 | -1.47 | SKDIGSE             | 2 |   |   |   | X |
| 41 | 50 | 606.7070 | 606.7071 | -0.16 | SKDIGSESTE          | 2 |   |   | X | X |
| 41 | 52 | 728.2496 | 728.2498 | -0.27 | SKDIGSESTEDQ        | 2 |   |   | X | X |
| 41 | 54 | 829.2889 | 829.2886 | 0.36  | SKDIGSESTEDQAM      | 2 |   |   |   | X |
| 41 | 58 | 714.9456 | 714.9444 | 1.68  | SKDIGSESTEDQAMEDIK  | 3 |   |   |   | X |
| 42 | 50 | 563.1909 | 563.1911 | -0.36 | KDIGSESTE           | 2 | X | X | X | X |
| 42 | 52 | 684.7324 | 684.7338 | -2.04 | KDIGSESTEDQ         | 2 |   | X | X | X |
| 42 | 54 | 785.7725 | 785.7726 | -0.13 | KDIGSESTEDQAM       | 2 | X | X | X | X |
| 42 | 55 | 850.2918 | 850.2939 | -2.47 | KDIGSESTEDQAME      | 2 | X | X | X | X |
| 42 | 56 | 907.8072 | 907.8074 | -0.22 | KDIGSESTEDQAMED     | 2 |   |   |   | X |
| 43 | 45 | 304.1497 | 304.1503 | -1.97 | DIG                 | 1 | X | X | X | X |
| 43 | 46 | 391.1819 | 391.1823 | -1.02 | DIGS                | 1 |   |   |   | X |

|    |    |          |           |       |                                    |   |   |   |   |   |
|----|----|----------|-----------|-------|------------------------------------|---|---|---|---|---|
| 43 | 54 | 721.7246 | 721.7251  | -0.69 | DIG <u>SE</u> STEDQAM              | 2 | X | X | X | X |
| 44 | 46 | 356.1208 | 356.1217  | -2.53 | IG <u>S</u>                        | 1 | X |   |   |   |
| 44 | 54 | 664.2101 | 664.2117  | -2.41 | IG <u>SE</u> STEDQAM               | 2 |   |   | X | X |
| 45 | 54 | 607.6693 | 607.6696  | -0.49 | G <u>SE</u> STEDQAM                | 2 | X | X | X | X |
| 45 | 55 | 672.1900 | 672.1909  | -1.34 | G <u>SE</u> STEDQAME               | 2 | X | X | X | X |
| 46 | 52 | 875.2634 | 875.2666  | -3.66 | SE <u>ST</u> EDQ                   | 1 |   |   | X | X |
| 46 | 53 | 473.6548 | 473.6555  | -1.48 | SE <u>ST</u> EDQA                  | 1 |   |   |   | X |
| 46 | 54 | 539.1752 | 539.1757  | -0.93 | SE <u>ST</u> EDQAM                 | 2 | X | X | X | X |
| 46 | 54 | 579.1587 | 579.1589  | -0.35 | <u>SE</u> STEDQAM                  | 2 | X | X | X | X |
| 46 | 55 | 603.6968 | 603.6970  | -0.33 | SE <u>ST</u> EDQAME                | 2 | X | X | X | X |
| 46 | 55 | 643.6799 | 643.6802  | -0.47 | <u>SE</u> STEDQAME                 | 2 |   |   | X |   |
| 46 | 56 | 661.2088 | 661.2105  | -2.57 | SE <u>ST</u> EDQAMED               | 2 |   |   |   | X |
| 46 | 58 | 821.7845 | 821.7832  | 1.58  | <u>SE</u> STEDQAMEDIK              | 2 | X | X | X | X |
| 47 | 49 | 336.1385 | 336.1401  | -4.76 | EST                                | 1 |   | X | X | X |
| 48 | 54 | 431.1381 | 431.1384  | -0.70 | <u>ST</u> EDQAM                    | 2 | X | X | X | X |
| 49 | 52 | 492.1915 | 492.1936  | -4.27 | TEDQ                               | 1 |   |   | X | X |
| 49 | 54 | 347.6386 | 347.6393  | -2.01 | TEDQAM                             | 2 |   |   | X | X |
| 50 | 52 | 391.1441 | 391.1460  | -4.86 | EDQ                                | 1 |   | X | X |   |
| 51 | 53 | 480.1746 | 480.1759  | -2.71 | DQAM <u>U</u>                      | 1 |   |   | X |   |
| 55 | 57 | 376.1711 | 376.1714  | -0.80 | EDI                                | 1 | X | X | X | X |
| 55 | 58 | 504.2649 | 504.2664  | -2.97 | EDIK                               | 1 |   |   | X | X |
| 56 | 58 | 375.2233 | 375.2238  | -1.33 | DIK                                | 1 | X | X | X | X |
| 62 | 74 | 841.2581 | 841.2578  | 0.36  | AES <u>IS</u> SSSEIVPN             | 2 | X | X | X |   |
| 64 | 66 | 386.1315 | 386.1323  | -2.07 | SIS <u>S</u>                       | 1 | X | X | X | X |
| 64 | 74 | 661.2529 | 661.2517  | 1.81  | SIS <u>SS</u> SEIVPN               | 2 |   |   |   | X |
| 64 | 74 | 701.2341 | 701.2348  | -1.00 | SIS <u>SS</u> SEIVPN               | 2 | X | X | X | X |
| 64 | 74 | 741.2181 | 741.2180  | 0.13  | <u>SI</u> SSSEIVPN                 | 2 | X | X | X | X |
| 64 | 79 | 1026.868 | 1026.8663 | 1.66  | SIS <u>SS</u> SEIVPN <u>S</u> VEQK | 2 | X | X | X | X |
| 65 | 74 | 657.7179 | 657.7188  | -1.37 | <u>IS</u> SSSEIVPN                 | 2 | X | X | X | X |
| 65 | 79 | 943.3653 | 943.3671  | -1.91 | <u>IS</u> SSSEIVPN <u>S</u> VEQK   | 2 | X | X | X | X |
| 65 | 79 | 983.3490 | 983.3503  | -1.32 | <u>IS</u> SSSEIVPN <u>S</u> VEQK   | 2 | X | X | X | X |
| 66 | 74 | 601.1766 | 601.1768  | -0.33 | <u>SS</u> SEIVPN                   | 2 | X | X | X |   |
| 67 | 73 | 920.3035 | 920.3050  | -1.63 | <u>S</u> SEIVP                     | 1 | X | X | X |   |
| 67 | 74 | 477.6941 | 477.6944  | -0.63 | <u>S</u> SEIVPN                    | 2 | X | X | X | X |
| 67 | 74 | 517.6769 | 517.6776  | -1.35 | <u>S</u> SEIVPN                    | 2 | X | X | X | X |
| 67 | 79 | 562.5417 | 562.5418  | -0.18 | <u>S</u> SEIVPN <u>S</u> VEQK      | 3 | X | X | X | X |
| 68 | 74 | 787.3812 | 787.3832  | -2.54 | SEEIVPN                            | 1 | X | X | X | X |
| 68 | 74 | 867.3469 | 867.3496  | -3.11 | <u>S</u> EEIVPN                    | 1 | X | X | X | X |
| 69 | 74 | 700.3500 | 700.3512  | -1.71 | EEIVPN                             | 1 | X | X | X | X |
| 69 | 79 | 676.3120 | 676.3107  | 1.92  | EEIVPN <u>S</u> VEQK               | 2 |   |   |   | X |

|     |     |          |          |       |                            |   |   |   |   |   |
|-----|-----|----------|----------|-------|----------------------------|---|---|---|---|---|
| 70  | 72  | 360.2128 | 360.2129 | -0.28 | EIV                        | 1 | X | X | X | X |
| 70  | 74  | 571.3086 | 571.3086 | 0.00  | EIVPN                      | 1 | X | X | X | X |
| 70  | 79  | 611.7877 | 611.7894 | -2.78 | EIVPN <u>S</u> VEQK        | 2 | X | X | X | X |
| 71  | 73  | 328.2232 | 328.2231 | 0.30  | IVP                        | 1 | X | X | X | X |
| 71  | 74  | 442.2652 | 442.2660 | -1.81 | IVPN                       | 1 | X | X | X | X |
| 71  | 79  | 547.2685 | 547.2681 | 0.73  | IVPN <u>S</u> VEQK         | 2 | X | X | X | X |
| 72  | 74  | 329.1810 | 329.1819 | -2.73 | VPN                        | 1 | X | X | X | X |
| 74  | 77  | 528.1686 | 528.1701 | -2.84 | <u>N</u> SVE               | 1 | X | X | X | X |
| 75  | 79  | 590.3120 | 590.3144 | -4.07 | SVEQK                      | 1 |   |   | X |   |
| 75  | 79  | 670.2776 | 670.2807 | -4.62 | <u>S</u> VEQK              | 1 | X | X | X | X |
| 75  | 82  | 524.7437 | 524.7448 | -2.10 | <u>S</u> VEQKH <u>I</u> Q  | 2 | X | X | X | X |
| 80  | 82  | 397.2178 | 397.2194 | -4.03 | HIQ                        | 1 |   |   |   | X |
| 80  | 88  | 526.7717 | 526.7722 | -0.95 | HIQKEDVPS                  | 2 |   |   |   | X |
| 83  | 88  | 674.3335 | 674.3355 | -2.97 | KEDVPS                     | 1 | X | X | X | X |
| 84  | 86  | 362.1572 | 362.1558 | 3.87  | EDV                        | 1 |   | X | X | X |
| 84  | 88  | 546.2391 | 546.2406 | -2.75 | EDVPS                      | 1 | X |   |   |   |
| 85  | 87  | 330.1648 | 330.1660 | -3.63 | DVP                        | 1 | X | X | X | X |
| 85  | 88  | 417.1967 | 417.1980 | -3.12 | DVPS                       | 1 | X | X | X | X |
| 85  | 89  | 546.2393 | 546.2406 | -2.38 | DVPSE                      | 1 |   |   |   | X |
| 85  | 89  | 351.6738 | 351.6745 | -1.99 | DVPSE <u>R</u>             | 2 | X |   |   |   |
| 85  | 93  | 518.2590 | 518.2589 | 0.19  | DVPSE <u>R</u> YL <u>G</u> | 2 |   |   |   | X |
| 89  | 97  | 585.7946 | 585.7931 | 2.56  | ERYLGYLEQ                  | 2 |   |   | X | X |
| 91  | 93  | 352.1857 | 352.1867 | -2.84 | YL <u>G</u>                | 1 | X | X | X | X |
| 91  | 94  | 515.2494 | 515.2500 | -1.16 | YLG <u>Y</u>               | 1 | X |   |   |   |
| 93  | 96  | 481.2283 | 481.2293 | -2.08 | GYL <u>E</u>               | 1 | X | X | X | X |
| 93  | 98  | 722.3719 | 722.3735 | -2.21 | GYLEQ <u>L</u>             | 1 |   |   | X |   |
| 93  | 100 | 496.2832 | 496.2822 | 2.01  | GYLEQLL <u>R</u>           | 2 |   |   |   | X |
| 94  | 96  | 424.2074 | 424.2078 | -0.94 | YL <u>E</u>                | 1 | X | X | X | X |
| 94  | 98  | 665.3495 | 665.3505 | -1.50 | YLEQ <u>L</u>              | 1 | X | X | X | X |
| 94  | 100 | 467.7727 | 467.7715 | 2.57  | YLEQLL <u>R</u>            | 2 |   |   | X | X |
| 95  | 97  | 389.2020 | 389.2031 | -2.83 | LEQ                        | 1 | X | X | X |   |
| 97  | 99  | 373.2438 | 373.2445 | -1.88 | QLL                        | 1 | X | X | X | X |
| 99  | 114 | 485.3043 | 485.3029 | 2.88  | LRLKKYKVPQLEIVPN           | 4 |   |   |   | X |
| 100 | 102 | 416.2963 | 416.2980 | -4.08 | RLK                        | 1 |   |   | X |   |
| 103 | 108 | 381.7288 | 381.7291 | -0.79 | KYKVPQ                     | 2 | X | X | X | X |
| 104 | 108 | 634.3555 | 634.3559 | -0.63 | YKVPQ                      | 1 | X | X | X | X |
| 105 | 108 | 471.2926 | 471.2917 | 1.91  | KVPQ                       | 1 |   |   | X |   |
| 105 | 110 | 357.2132 | 357.2127 | 1.40  | KVPQLE                     | 2 |   |   | X |   |
| 105 | 114 | 568.8390 | 568.8373 | 2.99  | KVPQLEIVPN                 | 2 |   |   | X | X |
| 108 | 110 | 389.2026 | 389.2031 | -1.28 | QLE                        | 1 | X | X | X |   |



|     |     |          |          |       |                    |   |   |   |   |   |
|-----|-----|----------|----------|-------|--------------------|---|---|---|---|---|
| 108 | 114 | 406.7297 | 406.7293 | 0.98  | QLEIVPN            | 2 |   |   | X | X |
| 109 | 111 | 374.2288 | 374.2286 | 0.53  | LEI                | 1 | X | X | X | X |
| 109 | 112 | 473.2970 | 473.2982 | -2.54 | LEIV               | 1 |   |   | X |   |
| 109 | 114 | 684.3942 | 684.3927 | 2.19  | LEIVPN             | 1 | X | X | X | X |
| 111 | 119 | 547.7476 | 547.7475 | 0.18  | IVPN <u>S</u> AEER | 2 | X | X | X | X |
| 115 | 120 | 671.2365 | 671.2396 | -4.62 | <u>S</u> AEER      | 1 | X | X | X | X |
| 115 | 122 | 421.2117 | 421.2118 | -0.24 | SAEERLH            | 2 |   |   |   | X |
| 115 | 122 | 461.1952 | 461.1949 | 0.65  | <u>S</u> AEERLH    | 2 | X | X | X | X |
| 115 | 123 | 504.7095 | 504.7109 | -2.77 | SAEERLHS           | 2 | X | X | X | X |
| 115 | 123 | 570.2323 | 570.2312 | 1.93  | <u>S</u> AEERLHSM  | 2 |   |   |   | X |
| 115 | 124 | 423.1881 | 423.1882 | -0.24 | <u>S</u> AEERLHSMK | 3 | X | X | X | X |
| 117 | 119 | 433.2025 | 433.2041 | -3.69 | EER                | 1 |   | X |   |   |
| 125 | 127 | 318.1650 | 318.1660 | -3.14 | EGI                | 1 | X | X | X | X |
| 141 | 143 | 332.1811 | 332.1816 | -1.51 | ELA                | 1 |   | X | X |   |
| 147 | 149 | 358.1972 | 358.1973 | -0.28 | PEL                | 1 | X | X | X | X |
| 148 | 150 | 408.2138 | 408.2129 | 2.20  | ELF                | 1 | X | X | X | X |
| 150 | 156 | 501.2649 | 501.2638 | 2.19  | FRQFYQL            | 2 |   |   | X | X |
| 154 | 156 | 423.2230 | 423.2238 | -1.89 | YQL                | 1 |   | X | X | X |
| 166 | 169 | 491.2875 | 491.2864 | 2.24  | YVPL               | 1 | X | X | X | X |
| 170 | 172 | 468.2068 | 468.2089 | -4.49 | GTQY               | 1 |   | X | X | X |
| 183 | 185 | 327.1647 | 327.1663 | -4.89 | PNP                | 1 |   | X |   |   |
| 183 | 187 | 497.2709 | 497.2718 | -1.81 | PNPIG              | 1 | X | X | X | X |
| 197 | 199 | 415.2337 | 415.2340 | -0.72 | PLW                | 1 |   |   |   | X |

---

*$\alpha$ S2-casein-derived peptides*

---

|    |    |           |           |       |                                  |   |   |   |   |   |
|----|----|-----------|-----------|-------|----------------------------------|---|---|---|---|---|
| 6  | 18 | 876.2639  | 876.2662  | -2.62 | HV <u>SS</u> SEESI <u>S</u> QE   | 2 | X | X | X |   |
| 6  | 21 | 1072.3683 | 1072.3692 | -0.84 | HV <u>SS</u> SEESI <u>S</u> QETK | 2 | X | X | X | X |
| 7  | 17 | 703.2309  | 703.2323  | -1.99 | V <u>SS</u> SEESI <u>S</u> Q     | 2 | X | X | X | X |
| 7  | 21 | 669.5622  | 669.5622  | 0.00  | V <u>SS</u> SEESI <u>S</u> QETK  | 3 | X | X | X | X |
| 8  | 13 | 785.1605  | 785.1638  | -4.20 | <u>SS</u> SEES                   | 1 | X | X | X | X |
| 8  | 21 | 914.3218  | 914.3224  | -0.66 | <u>SS</u> SEESI <u>S</u> QETK    | 2 | X |   |   |   |
| 9  | 14 | 811.2148  | 811.2158  | -1.23 | <u>S</u> SEESI                   | 1 | X | X | X | X |
| 9  | 16 | 546.1524  | 546.1528  | -0.73 | <u>S</u> SEESI <u>S</u>          | 2 | X | X | X |   |
| 9  | 18 | 674.7017  | 674.7034  | -2.52 | <u>S</u> SEESI <u>S</u> QE       | 2 | X | X | X | X |
| 9  | 19 | 725.2276  | 725.2272  | 0.55  | <u>S</u> SEESI <u>S</u> QET      | 2 | X | X | X | X |
| 9  | 21 | 870.8051  | 870.8063  | -1.38 | <u>S</u> SEESI <u>S</u> QETK     | 2 | X | X | X |   |
| 10 | 18 | 591.2036  | 591.2042  | -1.01 | <u>S</u> EESI <u>S</u> QE        | 2 |   | X | X |   |
| 13 | 21 | 574.7645  | 574.7654  | -1.57 | SI <u>S</u> QETK                 | 2 | X | X | X | X |
| 14 | 16 | 332.2175  | 332.2180  | -1.51 | IIS                              | 1 | X | X | X |   |

|     |     |           |           |       |                  |   |   |   |   |   |
|-----|-----|-----------|-----------|-------|------------------|---|---|---|---|---|
| 14  | 16  | 412.1838  | 412.1843  | -1.21 | IIS              | 1 | X | X | X | X |
| 14  | 18  | 335.1459  | 335.1464  | -1.49 | IISQE            | 2 | X |   |   |   |
| 14  | 21  | 531.2489  | 531.2494  | -0.94 | IISQETYK         | 2 | X |   |   |   |
| 17  | 21  | 334.6650  | 334.6661  | -3.29 | QETYK            | 2 | X |   |   |   |
| 18  | 20  | 412.1701  | 412.1714  | -3.15 | ETY              | 1 |   |   | X |   |
| 28  | 31  | 430.2296  | 430.2296  | 0.00  | INPS             | 1 | X | X | X | X |
| 28  | 31  | 510.1943  | 510.1960  | -3.33 | INPS             | 1 | X | X | X | X |
| 28  | 33  | 384.1699  | 384.1704  | -1.30 | INPSKE           | 2 | X | X | X | X |
| 28  | 35  | 497.7330  | 497.7339  | -1.81 | INPSKENL         | 2 | X | X | X | X |
| 41  | 43  | 375.2223  | 375.2238  | -4.00 | EVK              | 1 |   | X | X | X |
| 42  | 44  | 346.1970  | 346.1973  | -0.87 | EVV              | 1 | X | X | X | X |
| 49  | 51  | 406.1441  | 406.1456  | -3.69 | EEE              | 1 | X | X | X |   |
| 50  | 52  | 440.1662  | 440.1664  | -0.45 | EEY              | 1 | X | X | X | X |
| 54  | 61  | 518.1217  | 518.1215  | 0.39  | IGSSSEES         | 2 | X | X | X | X |
| 56  | 63  | 1065.2049 | 1065.2098 | -4.60 | SSSEESAE         | 1 | X | X | X | X |
| 56  | 66  | 668.6849  | 668.6852  | -0.45 | SSSEESAEVAT      | 2 | X |   |   |   |
| 56  | 70  | 911.3093  | 911.3094  | -0.11 | SSSEESAEVATEEVK  | 2 |   |   |   | X |
| 58  | 65  | 981.2843  | 981.2850  | -0.71 | SEESA EVA        | 1 |   |   | X | X |
| 67  | 69  | 376.1705  | 376.1714  | -2.39 | EEV              | 1 | X | X | X | X |
| 73  | 77  | 613.2915  | 613.2940  | -4.08 | VDDKH            | 1 |   |   |   | X |
| 100 | 114 | 604.9988  | 604.9967  | 3.47  | YQGPIVLNPWDQVKR  | 3 | X | X | X | X |
| 100 | 115 | 643.0113  | 643.0110  | 0.47  | YQGPIVLNPWDQVKRN | 3 |   |   |   | X |
| 101 | 103 | 301.1492  | 301.1506  | -4.65 | QGP              | 1 |   | X | X |   |
| 101 | 114 | 550.6429  | 550.6423  | 1.09  | QGPIVLNPWDQVKR   | 3 |   |   |   | X |
| 102 | 106 | 498.3301  | 498.3286  | 3.01  | GPIVL            | 1 | X | X |   |   |
| 104 | 106 | 344.2549  | 344.2544  | 1.45  | IVL              | 1 | X | X | X | X |
| 104 | 109 | 371.2192  | 371.2183  | 2.42  | IVLNPW           | 2 | X |   |   |   |
| 104 | 110 | 856.4568  | 856.4563  | 0.58  | IVNLPWD          | 1 |   |   |   | X |
| 104 | 114 | 456.5991  | 456.5980  | 2.41  | IVLNPWDQVKR      | 3 |   |   |   | X |
| 109 | 111 | 448.1821  | 448.1827  | -1.34 | WDQ              | 1 | X | X | X | X |
| 103 | 105 | 328.2232  | 328.2231  | 0.30  | PIV              | 1 | X | X | X | X |
| 115 | 122 | 812.4497  | 812.4512  | -1.85 | NAV PITPT        | 1 |   |   |   | X |
| 116 | 122 | 349.7074  | 349.7078  | -1.14 | AV PITPT         | 2 | X | X | X | X |
| 116 | 123 | 406.2508  | 406.2498  | 2.46  | AV PITPTL        | 2 |   |   |   | X |
| 118 | 122 | 528.3034  | 528.3028  | 1.14  | PITPT            | 1 | X | X | X | X |
| 119 | 122 | 431.2487  | 431.2500  | -3.01 | ITPT             | 1 | X | X | X | X |
| 119 | 123 | 544.3349  | 544.3341  | 1.47  | ITPTL            | 1 |   |   | X | X |
| 123 | 128 | 386.7185  | 386.7192  | -1.81 | LNREQ L          | 2 | X | X | X | X |
| 128 | 130 | 320.1809  | 320.1816  | -2.19 | LST              | 1 | X | X | X | X |
| 132 | 134 | 391.1444  | 391.1460  | -4.09 | EEN              | 1 | X | X | X |   |

|     |     |          |          |       |                    |   |   |   |   |   |
|-----|-----|----------|----------|-------|--------------------|---|---|---|---|---|
| 139 | 142 | 493.1954 | 493.1963 | -1.82 | VDME               | 1 | X | X | X | X |
| 139 | 147 | 568.7155 | 568.7145 | 1.76  | VDME <u>S</u> TEVF | 2 |   |   |   | X |
| 140 | 142 | 394.1264 | 394.1279 | -3.81 | DME                | 1 | X | X | X | X |
| 144 | 146 | 348.1763 | 348.1765 | -0.57 | TEV                | 1 |   | X | X | X |
| 145 | 148 | 495.2455 | 495.2449 | 1.21  | EVFT               | 1 | X | X | X | X |
| 146 | 148 | 366.2018 | 366.2023 | -1.37 | VFT                | 1 | X | X | X | X |
| 150 | 155 | 360.2177 | 360.2185 | -2.22 | KTKLTE             | 2 |   |   |   | X |
| 155 | 157 | 534.2395 | 534.2406 | -2.06 | EEEK               | 1 |   | X |   |   |
| 156 | 158 | 405.1965 | 405.1980 | -3.70 | EEK                | 1 | X | X | X | X |
| 159 | 163 | 332.1817 | 332.1823 | -1.81 | NRLNF              | 2 | X |   |   |   |
| 160 | 162 | 402.2440 | 402.2459 | -4.72 | RLN                | 1 | X | X | X | X |
| 161 | 163 | 393.2139 | 393.2132 | 1.78  | LNF                | 1 | X | X | X | X |
| 163 | 165 | 407.2638 | 407.2653 | -3.68 | FLK                | 1 | X | X | X | X |
| 173 | 175 | 352.2099 | 352.2105 | -1.70 | KFALPQ             | 2 |   | X |   |   |
| 174 | 178 | 575.3198 | 575.3188 | 1.74  | FALPQ              | 1 |   |   | X | X |
| 179 | 181 | 423.2595 | 423.2602 | -1.65 | YLK                | 1 | X | X | X | X |
| 182 | 184 | 382.1959 | 382.1973 | -3.66 | TVY                | 1 | X | X | X | X |
| 193 | 196 | 543.2945 | 543.2926 | 3.50  | WIQP               | 1 |   |   | X |   |
| 193 | 197 | 336.1974 | 336.1974 | 0.00  | WIQPK              | 2 | X | X | X | X |
| 194 | 197 | 485.3085 | 485.3082 | 0.62  | IQPK               | 1 |   |   | X |   |
| 198 | 203 | 360.7184 | 360.7182 | 0.55  | TKVIPY             | 2 | X | X | X | X |
| 198 | 207 | 417.9209 | 417.9202 | 1.67  | TKVIPYVRYL         | 3 |   | X | X | X |
| 199 | 203 | 619.3810 | 619.3814 | -0.65 | KVIPY              | 1 | X | X | X | X |
| 200 | 203 | 491.2869 | 491.2864 | 1.02  | VIPY               | 1 | X | X | X | X |
| 200 | 207 | 511.8067 | 511.8053 | 2.74  | VIPYVRYL           | 2 | X |   |   | X |
| 202 | 204 | 534.3034 | 534.3035 | -0.19 | PYVR               | 1 |   | X |   |   |
| 203 | 207 | 357.2029 | 357.2027 | 0.56  | YVRYL              | 2 | X | X | X | X |

One code letter was used for amino acids.

Underlined letter means phosphorylated amino acid.

z means peptide charge
