# Supplementary material for: An Integrated Peptidomics and In Silico Approach to Identify Novel Anti-Diabetic Peptides in Parmigiano-Reggiano Cheese
Source: MDPI journal article supplement (doi:10.3390/biology10060563), 2021-06-21
Supplement: s1 [file s1]

**Table S2.** Potential bioactive peptides (threshold > 0.5) identified through PeptideRanker software. Peptides are sorted in decreasing peptide rank values.

| Peptide rank value | Sequence          |
|--------------------|-------------------|
| 0.988634           | PPF               |
| 0.983520           | PFP               |
| 0.979835           | PLW               |
| 0.977357           | PFL               |
| 0.967512           | FFV               |
| 0.929380           | PFPI              |
| 0.919188           | VPPFL             |
| 0.907515           | FVAPFP            |
| 0.906948           | VMF               |
| 0.888252           | IHPF              |
| 0.875432           | FFVAP             |
| 0.852911           | FGK               |
| 0.851491           | PGPIP             |
| 0.845170           | IPPL              |
| 0.836815           | FVAPFPEVFGK       |
| 0.835842           | LNf               |
| 0.821039           | VAPFP             |
| 0.820430           | FVAPFPEVF         |
| 0.818475           | GPVRGPFPIIV       |
| 0.809221           | NIPPL             |
| 0.805333           | FLK               |
| 0.798251           | VVPPFL            |
| 0.797737           | LVYFPF            |
| 0.796828           | PGPI              |
| 0.794971           | LPLP              |
| 0.793557           | WIQP              |
| 0.774469           | YQEPVLGPVRGPFPIIV |
| 0.770664           | KIHPF             |
| 0.768503           | VAPFPEVFGK        |
| 0.767686           | EMPFPK            |
| 0.766829           | IPP               |
| 0.766282           | PGIPN             |
| 0.763061           | FRQFYQL           |
| 0.760743           | VFG               |
| 0.756965           | EPF               |
| 0.756225           | VAPFPEVF          |
| 0.753363           | SLVYFPGPPIPN      |

|          |                        |
|----------|------------------------|
| 0.751927 | PIP                    |
| 0.750635 | LVYPPFGP               |
| 0.747983 | VVPPF                  |
| 0.742455 | PFPE                   |
| 0.715773 | APFPE                  |
| 0.694061 | PNP                    |
| 0.691626 | GPIP                   |
| 0.686943 | DKIHPF                 |
| 0.672852 | QGP                    |
| 0.672533 | LHLPLP                 |
| 0.661305 | NRLNF                  |
| 0.659136 | FALPQ                  |
| 0.657245 | QGPIVLNPWDQVCR         |
| 0.657222 | PNPIG                  |
| 0.655570 | FVAPFPE                |
| 0.650217 | WIQPK                  |
| 0.646746 | LVYPPFGPIP             |
| 0.642316 | RFFVAPFPE              |
| 0.642092 | WDQ                    |
| 0.640399 | YLG                    |
| 0.632981 | FVAPFPEVFGKE           |
| 0.622409 | VVVPPFL                |
| 0.613770 | YLG                    |
| 0.613611 | PIP                    |
| 0.609408 | IPPLT                  |
| 0.608844 | FVAPFPEVFGKEK          |
| 0.608013 | FVAP                   |
| 0.607572 | NENLLRF                |
| 0.605988 | TPVVVPPFL              |
| 0.592346 | YQGPIVLNPWDQVCRN       |
| 0.592092 | FVAPFPEVFGKEKVNELSK    |
| 0.590640 | RPKHPIKHQGLPQEVNENLLRF |
| 0.588075 | LPPT                   |
| 0.584709 | QTPVVVPPFL             |
| 0.573178 | ENLLRF                 |
| 0.568648 | ELF                    |
| 0.561996 | FVAPFPEVFGKEKVN        |
| 0.561001 | YQGPIVLNPWDQVCR        |
| 0.542884 | GLPQ                   |
| 0.542672 | VVPPF                  |

|          |          |
|----------|----------|
| 0.536380 | IVLNPW   |
| 0.518940 | VIPYVRYL |
| 0.515736 | KFQ      |
| 0.514265 | VPP      |
| 0.502974 | GPIVL    |
| 0.501594 | LLY      |

---

Threshold was set at 0.5. Peptides with a peptide rank value below 0.5 are not shown
